**Supplementary Information: The mitochondrial genomes of the acoelomorph worms  
*Paratomella rubra* and *Isodiametra pulchra***

Helen E Robertson, François Lapraz, Bernhard Egger, Maximilian J Telford and Philipp H. Schiffer

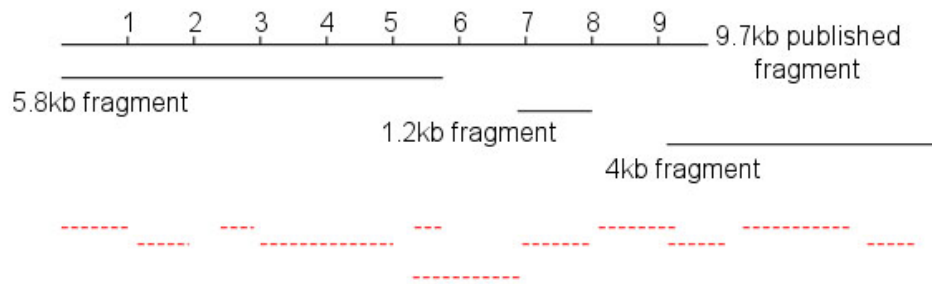

Supplementary Figure S1: Schematic of *Paratomella rubra* genome assembly fragments used as an initial starting point for mitochondrial genome inference. PCR sequencing results bridging or covering parts of these fragments indicated by red dashed lines.

Supplementary Table S2: Substitution pattern in eight genes found on the published *Paratomella rubra* mitochondrial genome (sampled from Barcelona, Spain) in comparison to our samples from Yorkshire, UK.

| <b>Sequence</b> | <b>Length</b> | <b>S-Sites</b> | <b>N-Sites</b> | <b>Substitutions</b> | <b>S-Substitutions</b> | <b>N-Substitutions</b> |
|-----------------|---------------|----------------|----------------|----------------------|------------------------|------------------------|
| <i>atp6</i>     | 594           | 90.8602        | 503.14         | 70                   | 40.9815                | 29.0185                |
| <i>atp8</i>     | 177           | 15.4355        | 161.565        | 23                   | 10                     | 13                     |
| <i>cob</i>      | 795           | 113.09         | 681.91         | 89                   | 63.9542                | 25.0458                |
| <i>cox1</i>     | 1401          | 158.705        | 1242.3         | 116                  | 90.904                 | 25.096                 |
| <i>cox2</i>     | 660           | 116.441        | 543.559        | 81                   | 50.9427                | 30.0573                |
| <i>cox3</i>     | 780           | 99.2387        | 680.761        | 87                   | 60.5296                | 26.4704                |
| <i>nad1</i>     | 930           | 95.8574        | 834.143        | 103                  | 63.3614                | 39.6386                |
| <i>nad2</i>     | 972           | 156.176        | 815.824        | 161                  | 56.7858                | 104.214                |
| <i>nad6</i>     | 330           | 44.3145        | 285.685        | 52                   | 31.121                 | 20.879                 |

Supplementary Table S3: Accession numbers (NCBI) for taxa used in study

| <b>Classification</b>       | <b>Species</b>                           | <b>Accession Number</b>            |
|-----------------------------|------------------------------------------|------------------------------------|
| <b>Acoela</b>               | <i>Paratomella rubra</i>                 | AY228758                           |
|                             | <i>Paratomella rubra</i> (this study)    | submitted                          |
|                             | <i>Symsagittifera roscoffensis</i>       | NC_014578.1                        |
|                             | <i>Isodiametra pulchra</i> (this study)  | submitted                          |
|                             | <i>Convolutriloba longifissura</i>       | Trace Archive<br>Library_id=CT_MM1 |
|                             | <i>Neochildia fusca</i>                  | Trace Archive<br>Library_id=NF_MM1 |
| <b>Annelida</b>             | <i>Platynereis dumerilii</i>             | AF178678                           |
|                             | <i>Urechis caupo</i>                     | NC_006379                          |
|                             | <i>Lumbricus terrestris</i>              | NC_001673.1                        |
| <b>Arthropoda</b>           | <i>Locusta migratoria</i>                | NC_001712                          |
|                             | <i>Daphnia pulex</i>                     | NC_000844                          |
| <b>Brachiopoda</b>          | <i>Terebratulina retusa</i>              | NC_000941.1                        |
| <b>Chaetognatha</b>         | <i>Spadella cephaloptera</i>             | NC_006386.1                        |
| <b>Chordata</b>             | <i>Salmo salar</i>                       | LC012541.1                         |
|                             | <i>Homo sapiens</i>                      | NC_001807                          |
|                             | <i>Lampetra fluviatilis</i>              | NC_001131                          |
|                             | <i>Ornithorhynchus anatinus</i>          | NC_000891.1                        |
|                             | <i>Branchiostoma floridae</i>            | NC_000834.1                        |
|                             | <i>Asymmetron inferum</i>                | NC_009774.1                        |
|                             | <i>Myxine glutinosa</i>                  | NC_002639.1                        |
|                             | <i>Acropora tenuis</i>                   | NC_003522.1                        |
| <b>Cnidaria</b>             | <i>Porites porites</i>                   | NC_008166                          |
|                             | <i>Discosoma sp</i>                      | NC_008071.1                        |
|                             | <i>Nematostella sp</i>                   | NC_008164                          |
|                             | <i>Aurelia aurita</i>                    | NC_008446.1                        |
| <b>Echinodermata</b>        | <i>Antedon mediterranea</i>              | NC_010692.1                        |
|                             | <i>Florometra serratissima</i>           | NC_001878.1                        |
|                             | <i>Strongylocentrotus pallidus</i>       | NC_009941.1                        |
|                             | <i>Strongylocentrotus droebachiensis</i> | NC_009940.1                        |
|                             | <i>Strongylocentrotus purpuratus</i>     | X12631.1                           |
|                             | <i>Acanthaster brevispinus</i>           | NC_007789.1                        |
|                             | <i>Acanthaster planci</i>                | NC_007788.1                        |
|                             | <i>Asterias amurensis</i>                | NC_006665.1                        |
|                             | <i>Apostichopus japonicus</i>            | NC_012616.1                        |
|                             | <i>Cucumaria miniata</i>                 | NC_005929                          |
|                             | <i>Ophiura albida</i>                    | NC_010691.1                        |
| <i>Ophiopholis aculeata</i> | NC_005334.1                              |                                    |
| <b>Hemichordata</b>         | <i>Balanoglossus carnosus</i>            | NC_001887.1                        |
|                             | <i>Saccoglossus kowalevskii</i>          | NC_007438                          |
| <b>Mollusca</b>             | <i>Sepia esculenta</i>                   | NC_009690.1                        |
|                             | <i>Aplysia californica</i>               | NC_005827.1                        |
|                             | <i>Pupa strigosa</i>                     | NC_002176                          |
|                             | <i>Biomphalaria tenagophila</i>          | NC_010220.1                        |
|                             | <i>Siphonodentalium lobatum</i>          | NC_005840.1                        |
| <b>Nemertodermatida</b>     | <i>Nemertoderma westbladi</i>            | AY228757.1                         |
| <b>Porifera</b>             | <i>Geodia neptuni</i>                    | NC_006990.1                        |
|                             | <i>Axinella corrugata</i>                | NC_006894.1                        |
|                             | <i>Tethya actinia</i>                    | NC_006991.1                        |
|                             | <i>Amphimedon queenslandica</i>          | NC_008944                          |
| <b>Priapulida</b>           | <i>Priapululus caudatus</i>              | DQ463747                           |
| <b>Urochordata</b>          | <i>Ciona intestinalis</i>                | NC_004447.2                        |
|                             | <i>Doliolum nationalis</i>               | AB176541.1                         |
| <b>Xenoturbellida</b>       | <i>Xenoturbella bocki</i>                | NC_008556.1                        |
|                             | <i>Xenoturbella hollendorum</i>          | NC_029218.1                        |
|                             | <i>Xenoturbella monstrosa</i>            | NC_029219.1                        |
|                             | <i>Xenoturbella churro</i>               | NC_029217.1                        |
|                             | <i>Xenoturbella profunda</i>             | NC_029220.1                        |
